# Supplementary material
Source: PubMed Central journal article supplement (PMC7526839)

**Supplementary Figure 1. *Pfmdr1* haplotypes in pre-treatment *P. falciparum* isolates**

Baseline genotypes of *pfmdr1* among *P. falciparum*-infected patients randomized to treatment with either DP or AL.

Denominator is  $n=92$ :

|            |        |
|------------|--------|
| Batubara   | $n=27$ |
| Langkat    | $n=22$ |
| South Nias | $n=43$ |

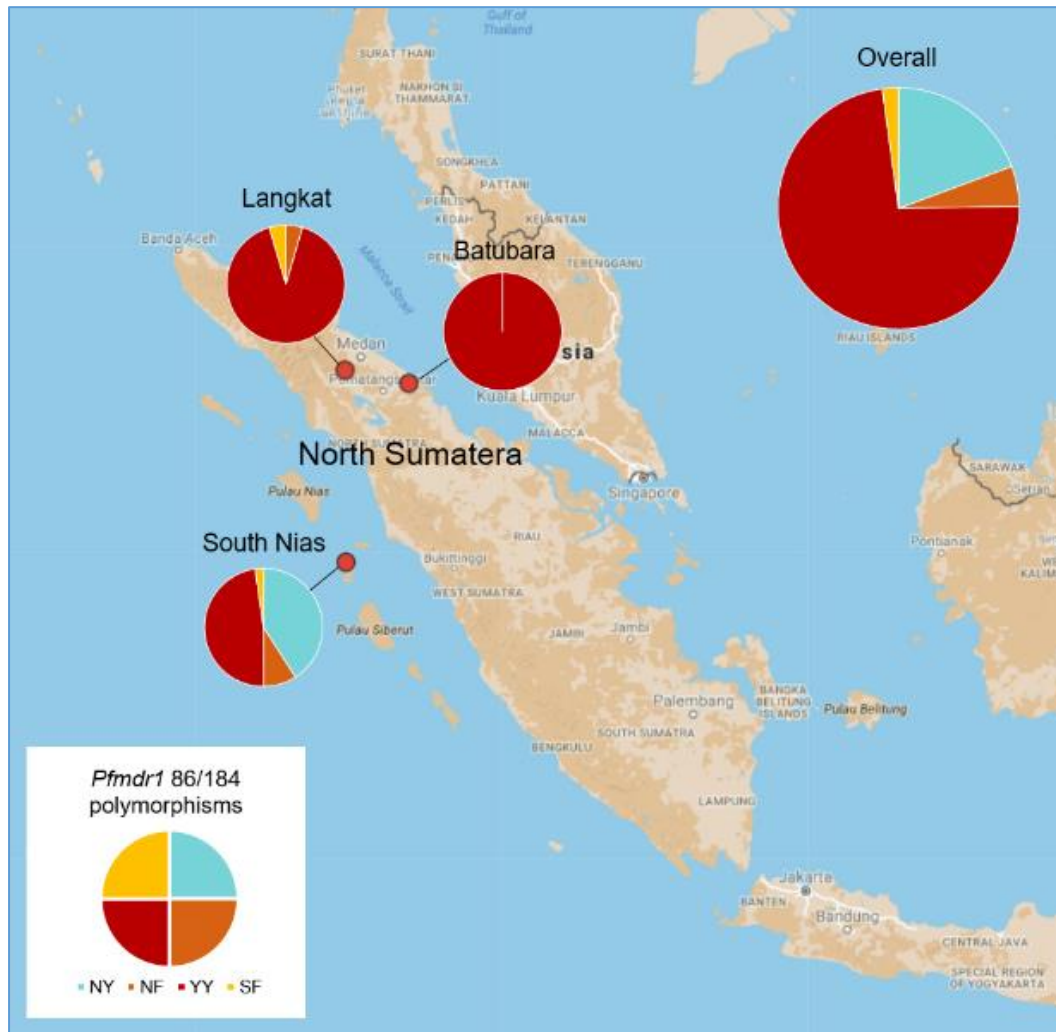

Supplement: AAC.02539-19-s0001.pdf [file AAC.02539-19-s0001.pdf]
